# Supplementary material for: Selective lithium extraction from brine via chemical reduction of iron phosphate with aqueous iron compounds
Source: Royal Society of Chemistry journal article supplement (doi:10.1039/d4se00703d), 2024-01-01
Supplement: d4se00703d1.pdf [file d4se00703d1.pdf]

## Supporting Information

Selective Lithium Extraction from Brine via Chemical Reduction of Iron Phosphate with  
Aqueous Iron Compounds

Jing Wang,<sup>a</sup> Alex W. Hawkins,<sup>a</sup> Amin T. Saasi,<sup>a</sup> Caroline G. Morin,<sup>a</sup> Geoffrey M. Geise<sup>a</sup>, Gary  
M. Koenig Jr.<sup>a\*</sup>

<sup>a</sup>Department of Chemical Engineering, University of Virginia, 385 McCormick Road,  
Charlottesville, VA, USA 22904-4741

**Table S1.** Simulated brine composition with high Li<sup>+</sup> concentration and 1:1 molar ratio of target Li<sup>+</sup>:M<sup>+2+</sup>, cations (M = K<sup>+</sup>, Na<sup>+</sup>, Mg<sup>2+</sup>). Chemicals listed in their order of addition.

| Order of addition | Chemicals                                                  | Simulated Brine (EDTA, Li <sup>+</sup> :M <sup>+2+</sup> 1:1) | Simulated Brine (Citrate, Li <sup>+</sup> :M <sup>+2+</sup> 1:1) |
|-------------------|------------------------------------------------------------|---------------------------------------------------------------|------------------------------------------------------------------|
| 1                 | DI Water                                                   |                                                               | Y g                                                              |
| 2                 | Acetic acid solution (1 M)                                 | X g                                                           |                                                                  |
| 3                 | EDTA                                                       | 0.1 M                                                         |                                                                  |
| 4                 | LiOH                                                       | 1.3 M, pH to ~7                                               |                                                                  |
| 5                 | Potassium Citrate                                          |                                                               | 0.1 M                                                            |
| 6                 | MCl (K <sup>+</sup> , Na <sup>+</sup> , Mg <sup>2+</sup> ) | 1.3 M                                                         | 1 M                                                              |
| 7                 | LiCl                                                       |                                                               | 1 M                                                              |
| 8                 | FeCl <sub>2</sub> • 4H <sub>2</sub> O                      | 0.1 M                                                         | 0.1 M                                                            |
| 9                 | FP                                                         | 0.5 g                                                         | 0.5 g                                                            |
|                   | Total                                                      | 100 g                                                         | 100 g                                                            |

“X” and “Y” were part of the baseline solution during preparation of the brine. These amounts were determined after subtracting the mass intended for all the other chemicals, and the mass of each chemical was calculated based on a targeted volume of 0.1 L of brine. The total mass of brine was 100 g. Due to the different mass of competing cations (M), the mass of the baseline solution (X or Y) slightly varied. The mass ranges for X and Y in the prepared solutions was 78-90 g and 80-90 g, respectively.

**Table S2.** Simulated brine composition to match the  $\text{Li}^+:\text{Na}^+$  molar ratio representative of the Salton Sea (1:78).<sup>1</sup> Chemicals listed in their order of addition.

| Order of addition | Chemicals                                 | Simulated Brine (EDTA, $\text{Li}^+:\text{Na}^+$ 1:78) | Simulated Brine (Citrate, $\text{Li}^+:\text{Na}^+$ 1:78) |
|-------------------|-------------------------------------------|--------------------------------------------------------|-----------------------------------------------------------|
| 1                 | DI water                                  |                                                        | Y g                                                       |
| 2                 | Acetic acid solution (1M)                 | X g                                                    |                                                           |
| 3                 | EDTA                                      | 15, 30, 50, 100, 200, 300 mM                           | 15, 30, 50, 100 mM                                        |
| 4                 | KOH                                       | Add until pH ~7                                        |                                                           |
| 5                 | NaCl                                      | 3.04 M                                                 | 3.04 M                                                    |
| 6                 | LiCl                                      | 0.039 M                                                | 0.039 M                                                   |
| 7                 | $\text{FeCl}_2 \cdot 4\text{H}_2\text{O}$ | 15, 30, 50, 100, 200, 300 mM                           | 15, 30, 50, 100 mM                                        |
| 8                 | FP                                        | 0.5 g                                                  | 0.5 g                                                     |
|                   | Total                                     | 100 g                                                  | 100 g                                                     |

“X” and “Y” were part of the baseline solution during preparation of the brine. These amounts were determined after subtracting the mass intended for all the other chemicals, and the mass of each chemical was calculated based on a targeted volume of 0.1 L of brine. The total mass of brine was 100 g. Due to the different mass of the redox mediator, EDTA- $\text{Fe}^{2+}$  and Citrate- $\text{Fe}^{2+}$ , the mass of the baseline solution (X or Y) slightly varied. The mass ranges for X and Y in the prepared solutions was 70-80 g and 70-84 g, respectively.

**Table S3.** Composition for brine prepared to be more representative of discharge from geothermal power plants at the Salton Sea.<sup>1</sup>

| Chemicals                             | Mass (g)<br>Mediator: EDTA-Fe <sup>2+</sup> | Mass (g)<br>Mediator: Citrate-Fe <sup>2+</sup> |
|---------------------------------------|---------------------------------------------|------------------------------------------------|
| Potassium Citrate                     | -                                           | 3.24                                           |
| EDTA                                  | 2.92                                        | -                                              |
| KOH                                   | 7.4                                         | -                                              |
| FeCl <sub>2</sub> • 4H <sub>2</sub> O | 0.6                                         | 0.6                                            |
| KCl                                   | 3.41                                        | 3.41                                           |
| LiCl                                  | 0.14                                        | 0.14                                           |
| MnCl <sub>2</sub> • 4H <sub>2</sub> O | 0.75                                        | 0.75                                           |
| NaCl                                  | 15.1                                        | 15.1                                           |
| Boric Acid                            | 0.25                                        | 0.25                                           |
| FeCl <sub>2</sub> • 4H <sub>2</sub> O | 1.98                                        | 1.98                                           |
| Water                                 | 67.5                                        | 74.5                                           |
| Total                                 | 100                                         | 100                                            |

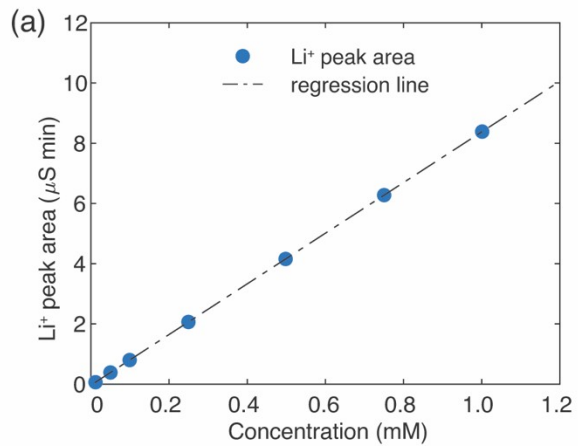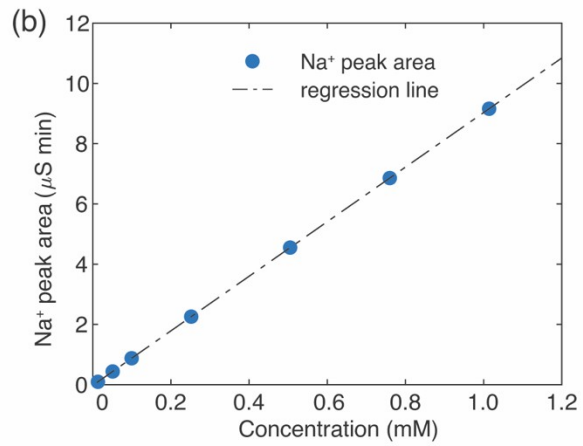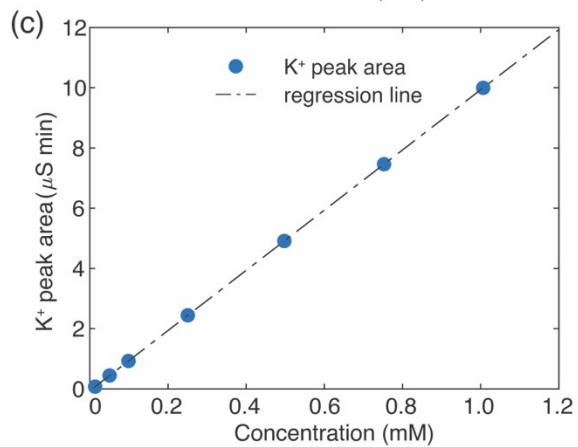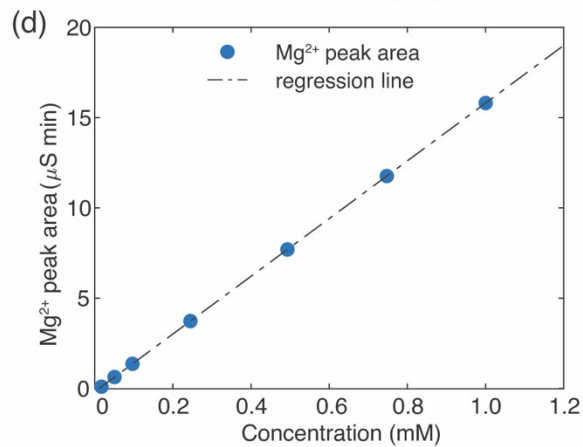

**Figure S1.** Calibration curves for peak area as a function of prepared cation concentration using ion chromatography. (a)  $\text{Li}^+$ , (b)  $\text{Na}^+$ , (c)  $\text{K}^+$ , and (d)  $\text{Mg}^{2+}$  are shown, and the solutions containing these cations were prepared as chloride salts. The targeted solution concentration range was 0.01 to 1 mM.

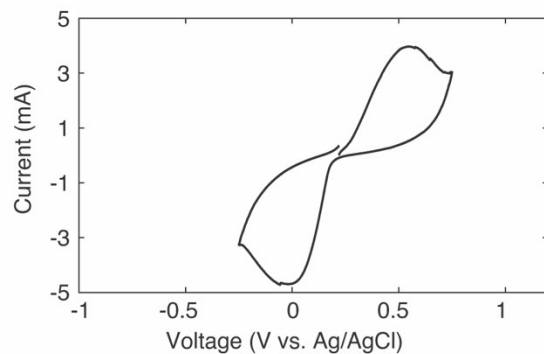

**Figure S2.** Cyclic voltammogram for LFP material as the working electrode measured in 1 M  $\text{Li}_2\text{SO}_4$  solution. The scan range was -0.25 V to 0.75 V (vs. Ag/AgCl), and the scan rate was 0.2  $\text{mV s}^{-1}$ .

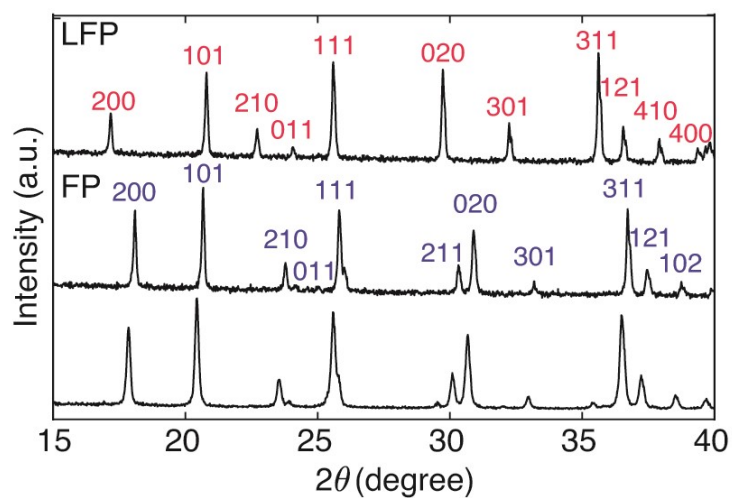

**Figure S3.** XRD pattern (bottom) for FP reduced in 1 M of LiCl solution at 75 °C for 24 hours with 0.1 M of FeCl<sub>2</sub> and no added ligands. XRD for LFP (top) and FP (middle) powders also provided.



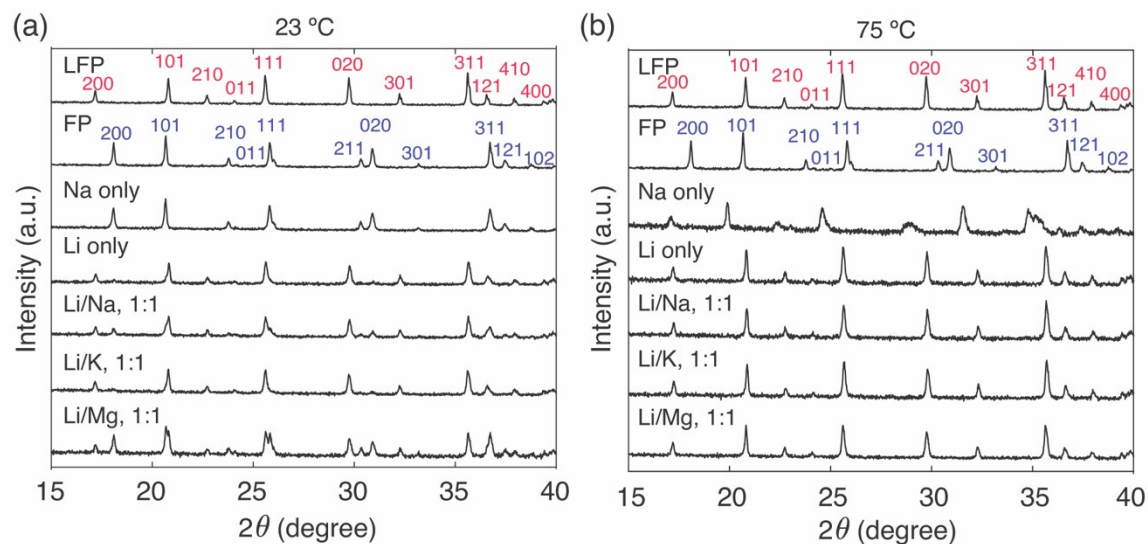

**Figure S4.** XRD patterns for FP powder after chemical reduction at (a) 23 °C and (b) 75 °C in brine solutions using EDTA-Fe<sup>2+</sup> redox mediators. Each monovalent cation concentrations in the brine were ~1.3 M, and the molar ratios of the cations in the brine are indicated on the Figure. At the top of each Figure are the patterns for the as received LFP powder and the LFP powder after chemical oxidation with hydrogen peroxide to form FP.

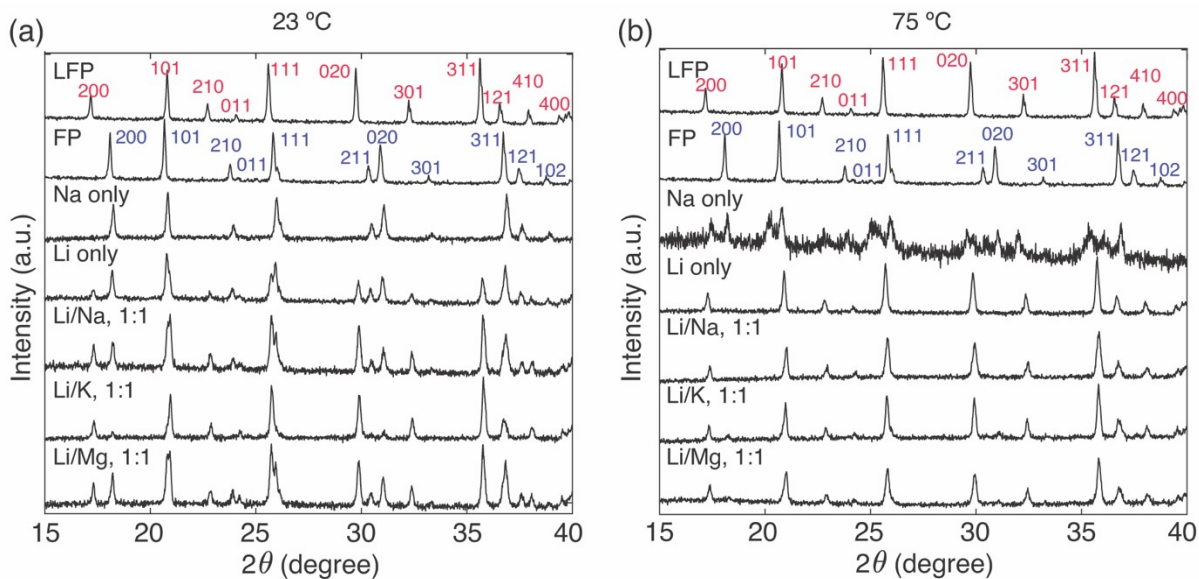

**Figure S5.** XRD patterns for FP powder after chemical reduction at (a) 23 °C and (b) 75 °C using brine solutions containing Citrate-Fe<sup>2+</sup> redox mediators. Each monovalent cation concentrations in the brine were ~1 M, and the molar ratios of the cations in the brine are indicated on the Figure. At the top of the Figure are the patterns for the as received LFP powder and the LFP powder after chemical oxidation with hydrogen peroxide to form FP.

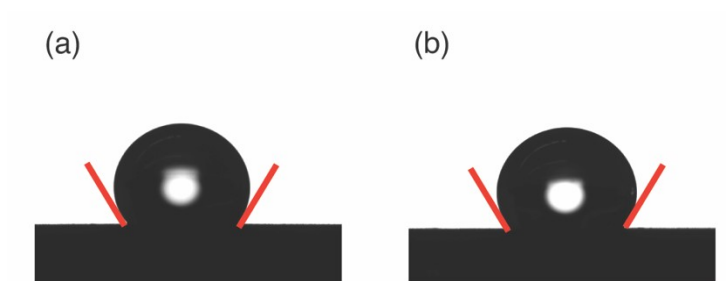

**Figure S6.** Example droplet images for determining contact angle of 1:78  $\text{Li}^+:\text{Na}^+$  brine solution with 0.1 M of redox mediator (a) Citrate- $\text{Fe}^{2+}$  and (b) EDTA- $\text{Fe}^{2+}$  on FP composite electrode.

**Table S4.** Comparison of Li<sup>+</sup> adsorption capacity, selectivity, and energy consumption with reported literature using electrochemical methods for Li<sup>+</sup> extraction from brine.

| System                                                                                 | Li <sup>+</sup> /Na <sup>+</sup> concentration        | Total cations concentration in the brine source (g/L) | Selectivity factor $\alpha_{Na}^{Li}$ | Capacity (mg Li <sup>+</sup> g <sup>-1</sup> ) | Energy (Wh mol <sup>-1</sup> ) | Ref       |
|----------------------------------------------------------------------------------------|-------------------------------------------------------|-------------------------------------------------------|---------------------------------------|------------------------------------------------|--------------------------------|-----------|
| FP/LFP                                                                                 | 0.1 M Li <sup>+</sup> /<br>4.2 M Na <sup>+</sup>      | 113                                                   | 479                                   | 30                                             | -                              | 2         |
| LFP/Ag                                                                                 | 0.05 M Li <sup>+</sup> /<br>5 M Na <sup>+</sup>       | 115                                                   | 548                                   | 7.76                                           | 1±0.6                          | 3         |
| Li <sub>1-x</sub> FePO <sub>4</sub> /C                                                 | 0.005 M Li <sup>+</sup> /<br>0.05 M Na <sup>+</sup>   | 1.2                                                   | -                                     | 21                                             | 3.03±0.5                       | 4         |
| LFP/FP                                                                                 | 0.004 M Li <sup>+</sup> /<br>0.03 M Na <sup>+</sup>   | 1.44                                                  | 70.63                                 | 17.1                                           | -                              | 5         |
| LFP/C/<br>K <sub>2</sub> MFe(CN) <sub>6</sub>                                          | 0.004 M Li <sup>+</sup> /<br>0.03 M Na <sup>+</sup>   | 1.44                                                  | -                                     | 26.75                                          | 22.21                          | 6         |
| LiFePO <sub>4</sub> /<br>NiHCF                                                         | 0.0019 M Li <sup>+</sup> /<br>0.011 M Na <sup>+</sup> | 1.01                                                  | -                                     | 13                                             | 8.7                            | 7         |
| LFP/AEM/F<br>P                                                                         | 0.07 M Li <sup>+</sup> /<br>4 M Na <sup>+</sup>       | 92.5                                                  | 138                                   | 27                                             | -                              | 8         |
| LFP/Pt                                                                                 | 0.2 M Li <sup>+</sup> /<br>4.5 M Na <sup>+</sup>      | 105                                                   | 210.5                                 | 14.62                                          | 0.768                          | 9         |
| NMC/Ag                                                                                 | 0.2 M Li <sup>+</sup> /<br>2.6 M Na <sup>+</sup>      | 109                                                   | 770                                   | 10.8                                           | 2.6                            | 10        |
| Pt/MnO <sub>2</sub>                                                                    | 0.0007 M Li <sup>+</sup> /<br>0.046 M Na <sup>+</sup> | 1.26                                                  | -                                     | 11                                             | -                              | 11        |
| LiMn <sub>2</sub> O <sub>4</sub> /<br>Li <sub>1-x</sub> Mn <sub>2</sub> O <sub>4</sub> | 0.021 M Li <sup>+</sup> /<br>0.33 M Na <sup>+</sup>   | 9                                                     | 320                                   | 21                                             | 18                             | 12        |
| HTO (RGO-<br>TA)/C                                                                     | 0.2 M Li <sup>+</sup> /<br>2.75 M Na <sup>+</sup>     | 64.7                                                  | 57                                    | 25.2                                           | -                              | 13        |
| LFP/<br>Citrate-Fe <sup>2+</sup>                                                       | 0.039 M Li <sup>+</sup> /<br>3.04 M Na <sup>+</sup>   | 83                                                    | 380                                   | 14                                             | 0                              | This work |
| LFP/<br>EDTA-Fe <sup>2+</sup>                                                          | 0.039 M Li <sup>+</sup> /<br>3.04 M Na <sup>+</sup>   | 83                                                    | 60                                    | 14                                             | 0                              | This work |
| [-]: data are not reported in the work.                                                |                                                       |                                                       |                                       |                                                |                                |           |

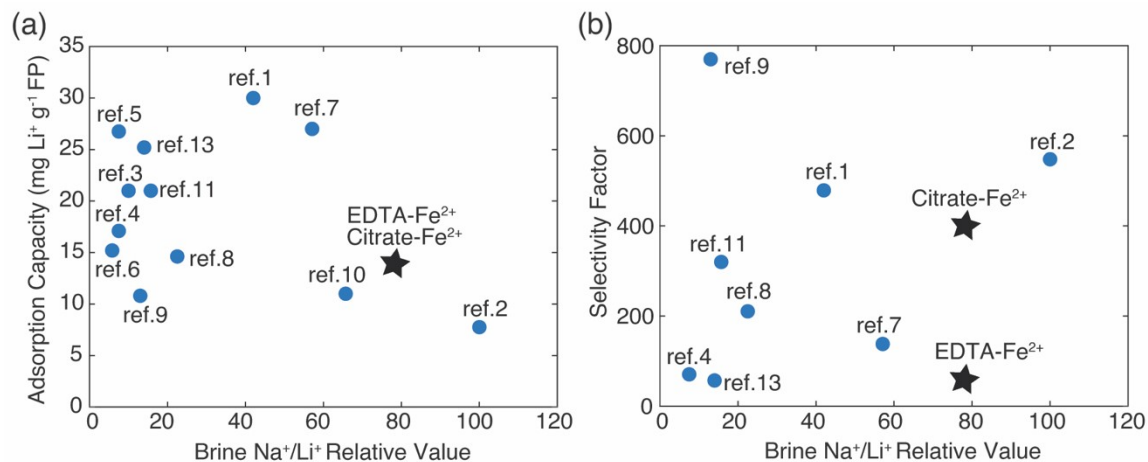

**Figure S7.** (a) Li<sup>+</sup> adsorption capacity and (b) Li<sup>+</sup> selectivity factor for this work (black stars) and previous reports (blue dots, from Refs. 2-13). In most cases, adsorption capacity was converted to the same unit basis from the reported data and Li<sup>+</sup> selectivity factor was recalculated based on Eqn. 1 in main text.

## References

- 1 S. Ventura, S. Bhamidi, M. Hornbostel and A. Nagar, *Calif. Energy Comm.*, 2020, CEC-500-2020-020.
- 2 W. Xu, D. Liu, X. Liu, D. Wang, L. He and Z. Zhao, *Desalination*, 2022, **546**, 116188.
- 3 M. Pasta, A. Battistel and F. La Mantia, *Energy Environ. Sci.*, 2012, **5**, 9487–9491.
- 4 L. Wang, K. Frisella, P. Srimuk, O. Janka, G. Kickelbick and V. Presser, *Sustain. Energy Fuels*, 2021, **5**, 3124–3133.
- 5 S. Sun, X. Yu, M. Li, J. Duo, Y. Guo and T. Deng, *J. Clean. Prod.*, 2020, **247**, 119178.
- 6 T. Han, X. Yu, Y. Guo, M. Li, J. Duo and T. Deng, *Electrochim. Acta*, 2020, **350**, 136385.
- 7 R. Tröcoli, A. Battistel and F. La Mantia, *ChemSusChem*, 2015, **8**, 2514–2519.
- 8 J. Xiong, L. He and Z. Zhao, *Desalination*, 2022, **535**, 115822.
- 9 M. Du, J.-Z. Guo, S.-H. Zheng, Y. Liu, J.-L. Yang, K.-Y. Zhang, Z.-Y. Gu, X.-T. Wang and X.-L. Wu, *Chinese Chem. Lett.*, 2022, **34**, 107706.
- 10 C. P. Lawagon, G. M. Nisola, R. A. I. Cuevas, H. Kim, S. P. Lee and W. J. Chung, *Chem. Eng. J.*, 2018, **348**, 1000–1011.
- 11 H. Kanoh, K. Ooi, Y. Miyai and S. Katoh, *Sep. Sci. Technol.*, 1993, **28**, 643–651.
- 12 M. Y. Zhao, Z. Y. Ji, Y. G. Zhang, Z. Y. Guo, Y. Y. Zhao, J. Liu and J. S. Yuan, *Electrochim. Acta*, 2017, **252**, 350–361.
- 13 J. Zhang, Z. Cheng, X. Qin, X. Gao, R. Yun and X. Xiang, *ACS Appl. Mater. Interfaces*, 2023, **15**, 29586–29596.
